# Supplementary material for: Genotypic variation in disease susceptibility among cultured stocks of elkhorn and staghorn corals
Source: PubMed Central journal article supplement (PMC6459175; doi:10.7717/peerj.6751), 2019-04-08
Supplement: peerj-07-6751-s001.pdf [file peerj-07-6751-s001.pdf]

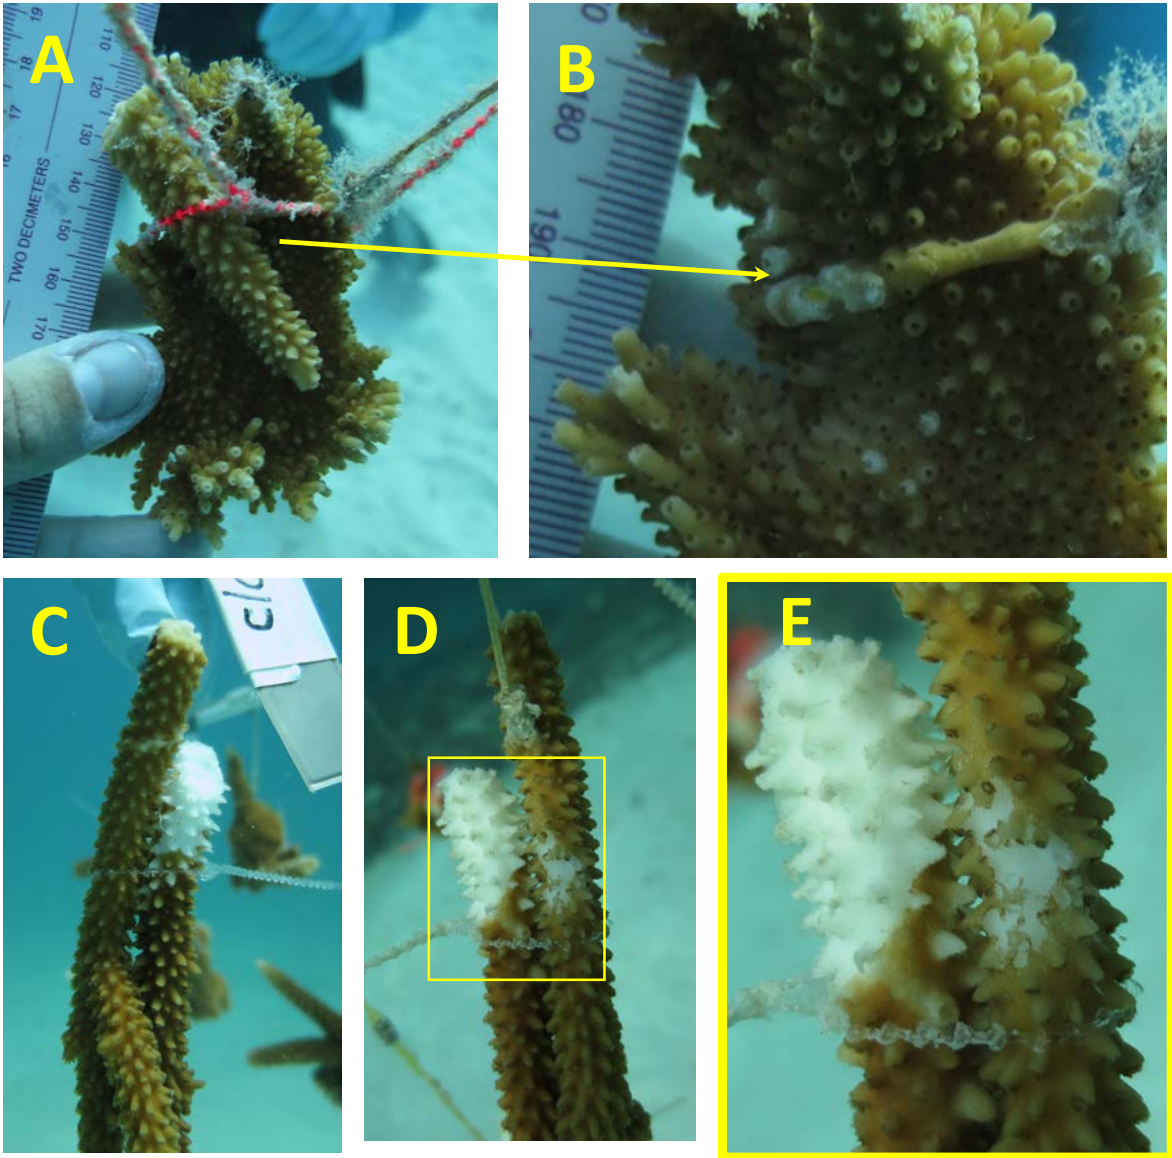

Suppl Fig 1: A-B) 'healthy' allograft control after 7 days illustrating slight abrasion of raised tissue, but no tissue-loss lesions as observed in disease transmission (C: day 0, D: Day 3, E: close-up of elicited lesion)
